# Supplementary material for: Efficient interfacial charge transfer: establishing a B–Co electron bridge and heterojunction synergistic enhancement of hydrogen evolution activity between borophene and Co 9 S 8
Source: Royal Society of Chemistry journal article supplement (doi:10.1039/d4ta03636k), 2024-01-01
Supplement: d4ta03636k1.pdf [file d4ta03636k1.pdf]

# Efficient interfacial charge transfer: Establish B-Co electron bridge and heterojunction synergistic enhancement of hydrogen evolution activity between Borophene and Co<sub>9</sub>S<sub>8</sub>

Yan Shang, Jing Xu\*

*School of Chemistry and Chemical Engineering, Ningxia Key Laboratory of Solar Chemical Conversion Technology, Key Laboratory for Chemical Engineering and Technology, State Ethnic Affairs Commission, North Minzu University, Yinchuan 750021, P.R.China*

\* Corresponding author: Jing\_XU@nmu.edu.cn

## Experimental section

### 1. Characterization

Scanning electron microscope (SEM) and transmission electron microscope (TEM) were tested by ESCALAB 250Xi. X-ray diffractometer(XRD) was detected by Japanese instrument Rigaku RINT-2000. The crystal structure is determined by the data of azimuth and intensity distributed in space. The morphology and internal structure of the catalyst were analyzed. The specific surface area and pore size distribution were measured by N<sub>2</sub> adsorption-desorption curve. The degassing temperature is controlled at 50°C-350°C. X-ray photoelectron spectroscopy (XPS) is used for elemental analysis and valence identification, and the X-ray source is an X-ray tube with Al or Mg as anode. The detection wavelength range of ultraviolet-visible diffuse reflectance spectrum is 200-800nm, and its model is Shimadzu (UV-2550). Lambert-Beer law is used to describe the light absorption intensity. The electrochemistry is tested by electrochemical workstation and three-electrode system.

### 2. Photocatalysis experiment

A 5W LED lamp (PCX-50B Discover  $\lambda > 420$  nm) was used to simulate the solar light source. 10 mg of catalyst, 24 mg of Eosin Y (EY AR) and 30 ml of triethanolamine (TEOA AR,98%) were weighed for ultrasonic stirring and mixing. The reaction was carried out in a multichannel photocatalytic reaction system (PCX-50B Discover) for five hours. A sampling needle is used to

absorb 500  $\mu\text{L}$  of gas every hour, and  $\text{N}_2$  is used as the carrier gas for detection in gas chromatography ( $\text{N}_2$  carrier gas, Tianmei GC7900, TCD, 13 column). The hydrogen production per hour was obtained by calculating the peak area.

### 3. Calculation details

The Cambridge structure database (CCDC) is used to search the crystal structure, and the software is transformed into XRD simulation map for comparison, and a matching crystal model is found for optimization. Using the formula  $Deviation (\%) = \frac{Final\ volume - Initial\ volume}{Initial\ volume} \times 100$ . The data error after model optimization is calculated. The appropriate k-points and energy cutoff are selected. Density functional theory (DFT) was used to calculate.

Table 1 Basic data for DFT calculations

| Samples                 | Functional | Energy cutoff (eV) | K-point set           | Deviation (%) |
|-------------------------|------------|--------------------|-----------------------|---------------|
| Borophene               | GGA-PBE    | 400                | $3 \times 4 \times 5$ | 0.56          |
| $\text{Co}_9\text{S}_8$ | GGA-PBE    | 350                | $1 \times 2 \times 1$ | 0.83          |

### 4. Photocatalytic performance

As shown in Table 2, the hydrogen production activity of  $\text{Co}_9\text{S}_8/\text{Borophene}$  was compared with that of other catalysts reported in the literature. The hydrogen production capacity of  $\text{Co}_9\text{S}_8/\text{Borophene}$  was  $4271.40 \mu\text{mol}\cdot\text{g}^{-1}\cdot\text{h}^{-1}$ . It has excellent hydrogen production activity and great potential in the field of photocatalytic hydrogen production.

Table.2 Comparison of the hydrogen production activity of  $\text{Co}_9\text{S}_8/\text{Borophene}$  and previously reported.

| Sample                                            | Light source  | Acrificial agent                             | Hydrogen production ( $\mu\text{mol}\cdot\text{g}^{-1}\cdot\text{h}^{-1}$ ) | Refs.     |
|---------------------------------------------------|---------------|----------------------------------------------|-----------------------------------------------------------------------------|-----------|
| $\text{Co}_9\text{S}_8/\text{Borophene}$          | 5 W LED       | TEOA,EY                                      | 4271.40                                                                     | This work |
| $\text{Co}_9\text{S}_8/\text{ZnSe}$               | 300 W Xe Lamp | $\text{Na}_2\text{SO}_3/\text{Na}_2\text{S}$ | 967.80                                                                      | [1]       |
| P- $\text{Co}_9\text{S}_8/\text{g-C}_3\text{N}_4$ | 5 W LED       | TEOA,EY                                      | 4362.00                                                                     | [2]       |
| $\text{Co}_9\text{S}_8\text{-GDY-CuI}$            | 5 W LED       | TEOA,EY                                      | 1411.82                                                                     | [3]       |
| $\text{Co}_9\text{S}_8/\text{RP}$                 | 5 W LED       | TEOA,EY                                      | 1562.50                                                                     | [4]       |
| $\text{Co}_9\text{S}_8/\text{CdS/ZIF-67}$         | 300 W Xe Lamp | $\text{Na}_2\text{SO}_3/\text{Na}_2\text{S}$ | 1852.00                                                                     | [5]       |

## Supplemental Figure

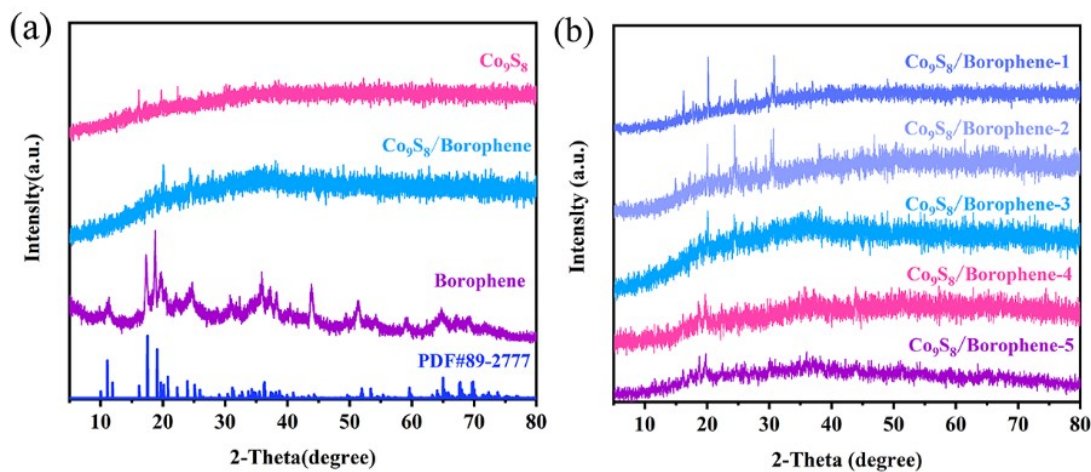

S1 The XRD patterns of (a) Borophene,  $\text{Co}_9\text{S}_8$  and  $\text{Co}_9\text{S}_8/\text{Borophene}$ ; (b)  $\text{Co}_9\text{S}_8/\text{Borophene-n}$  ( $n=1,2,3,4,5$ )

## References

- [1] M. Li, D. Zhang, h. Zhou, K. Sun, X. Ma, M. Dong, Construction of hollow tubular  $\text{Co}_9\text{S}_8/\text{ZnSe}$  S-scheme heterojunctions for enhanced photocatalytic  $\text{H}_2$  evolution, *International Journal of Hydrogen Energy*, 48 (2023) 5126-5137.
- [2] X. Ma, Z. Lei, C. Wang, Z. Fu, X. Hu, J. Fan, E. Liu, Fabrication of P-doped  $\text{Co}_9\text{S}_8/\text{g-C}_3\text{N}_4$  heterojunction for excellent photocatalytic hydrogen evolution, *International Journal of Hydrogen Energy*, 46 (2021) 36781-36791.
- [3] Z. Jin, H. Li, J. Li, Efficient photocatalytic hydrogen evolution over graphdiyne boosted with a cobalt sulfide formed S-scheme heterojunction, *Chinese Journal of Catalysis*, 43 (2022) 303-315.
- [4] F. Zhao, M. Zhang, D. Yan, X. Hu, J. Fan, T. Sun, E. Liu, S-Scheme  $\text{Co}_9\text{S}_8$  Nanoflower/Red Phosphorus Nanosheet Heterojunctions for Enhanced Photocatalytic  $\text{H}_2$  Evolution, *Acs Applied Nano Materials*, 6 (2023) 14478-14487.
- [5] L. Cheng, Y. Yu, R. Huang, X. Shi, Lollipop-shaped  $\text{Co}_9\text{S}_8/\text{CdS}$  nanocomposite derived from zeolitic imidazolate framework-67 for the photocatalytic hydrogen production, *International Journal of Hydrogen Energy*, 46 (2021) 31288-31299.
